# Supplementary material
Source: PubMed Central journal article supplement (PMC3056636)
Supplement: blood-2010-04-278796_1.pdf [file blood-2010-04-278796_1.pdf]

The **Childhood Cancer Survivor Study (CCSS)** is a collaborative, multi-institutional project, funded as a resource by the National Cancer Institute, of individuals who survived five or more years after diagnosis of childhood cancer.

**CCSS** is a retrospectively ascertained cohort of 20,346 childhood cancer survivors diagnosed before age 21 between 1970 and 1986 and approximately 4,000 siblings of survivors, who serve as a control group. The cohort was assembled through the efforts of 26 participating clinical research centers in the United States and Canada. The study is currently funded by a U24 resource grant (NCI grant # U24 CA55727) awarded to St. Jude Children's Research Hospital. Currently, we are in the process of expanding the cohort to include an additional 14,000 childhood cancer survivors diagnosed before age 21 between 1987 and 1999. For information on how to access and utilize the CCSS resource, visit [www.stjude.org/ccss](http://www.stjude.org/ccss)

### **CCSS Institutions and Investigators**

St. Jude Children's Research Hospital, Memphis, TN

Children's Healthcare of Atlanta/Emory University  
Atlanta, GA

Children's Hospitals and Clinics of Minnesota Minneapolis  
St. Paul, MN

Seattle Children's Hospital, Seattle, WA

Children's Hospital, Denver, CO

Children's Hospital Los Angeles, CA

Children's Hospital, Oklahoma City, OK

Children's Hospital of Orange County, Orange, CA

Children's Hospital of Philadelphia, Philadelphia, PA

Children's Hospital of Pittsburgh, Pittsburgh, PA

Children's National Medical Center, Washington, DC

Cincinnati Children's Hospital Medical Center

Cincinnati, OH

City of Hope Medical Center, Los Angeles, CA

Cook Children's Medical Center, Ft. Worth, TX

Dana-Farber Cancer Institute/Children's Hospital

Boston, MA

Fred Hutchinson Cancer Research Center, Seattle, WA

Hospital for Sick Children, Toronto, ON

International Epidemiology Institute, Rockville, MD

Mayo Clinic, Rochester, MN

Memorial Sloan-Kettering Cancer Center, New York, NY

Miller Children's Hospital, Long Beach, CA

National Cancer Institute, Bethesda, MD

Nationwide Children's Hospital, Columbus, Ohio

Northwestern University, Chicago, IL

Riley Hospital for Children, Indianapolis, IN

Roswell Park Cancer Institute, Buffalo, NY

St. Louis Children's Hospital, St. Louis, MO

Stanford University School of Medicine, Stanford, CA

Texas Children's Hospital, Houston, TX

University of Alabama, Birmingham, AL

University of Alberta, Edmonton, AB

University of California-Los Angeles, CA

University of California-San Francisco, CA

University of Chicago, Chicago, IL

University of Michigan, Ann Arbor, MI

University of Minnesota, Minneapolis, MN

University of Southern California, Los Angeles, CA

UT-Southwestern Medical Center, Dallas, TX

U.T.M.D. Anderson Cancer Center, Houston, TX

Leslie L. Robison, PhD<sup>#‡</sup>, Melissa Hudson, MD<sup>\*‡</sup>

Greg T. Armstrong, MD, MSCE<sup>‡</sup>, Daniel M. Green, MD<sup>‡</sup>

Kevin R. Krull, PhD<sup>‡</sup>

Lillian Meacham, MD<sup>\*</sup>, Ann Mertens, PhD<sup>‡</sup>

Joanna Perkins, MD, MS<sup>\*</sup>

Scott Baker, MD<sup>\*</sup>, Eric Chow, MD, MPH<sup>‡</sup>

Brian Greffe, MD<sup>\*</sup>

Kathy Ruccione, RN, MPH<sup>\*</sup>

John Mulvihill, MD<sup>\*‡</sup>

Leonard Sender, MD<sup>\*</sup>

Jill Ginsberg, MD<sup>\*</sup>, Anna Meadows, MD<sup>‡</sup>

Jean Tersak, MD<sup>\*</sup>

Gregory Reaman, MD<sup>\*</sup>, Roger Packer, MD<sup>‡</sup>

Stella Davies, MD, PhD<sup>\*‡</sup>

Smita Bhatia, MD<sup>\*‡</sup>

Paul Bowman, MD, MPH<sup>\*</sup>

Lisa Diller, MD<sup>\*‡</sup>

Wendy Leisenring, ScD<sup>\*‡</sup>

Mark Greenberg, MBChB<sup>\*</sup>, Paul C. Nathan, MD, MSc<sup>\*‡</sup>

John Boice, ScD<sup>\*‡</sup>

Vilmarie Rodriguez, MD<sup>\*</sup>

Charles Sklar, MD<sup>\*‡</sup>, Kevin Oeffinger, MD<sup>‡</sup>

Jerry Finklestein, MD<sup>\*</sup>

Roy Wu, PhD<sup>‡</sup>, Nita Seibel, MD<sup>‡</sup>,

Preetha Rajaraman, PhD<sup>‡</sup>, Peter Inskip, ScD<sup>‡</sup>

Julia Rowland, PhD<sup>‡</sup>

Amanda Termuhlen, MD<sup>\*</sup>, Sue Hammond, MD<sup>‡</sup>

Kimberley Dilley, MD, MPH<sup>\*</sup>

Terry A. Vik, MD<sup>\*</sup>

Denise Rokitka, MD, MPH<sup>\*</sup>

Robert Hayashi, MD<sup>\*</sup>

Neysa Marina, MD<sup>\*</sup>, Sarah S. Donaldson, MD<sup>‡</sup>

Zoann Dreyer, MD<sup>\*</sup>

Kimberly Whelan, MD, MSPH<sup>\*</sup>

Yutaka Yasui, PhD<sup>\*‡</sup>

Jacqueline Casillas, MD, MSHS<sup>\*</sup>, Lonnie Zeltzer, MD<sup>‡</sup>

Robert Goldsby, MD<sup>\*</sup>

Tara Henderson, MD, MPH<sup>\*</sup>

Raymond Hutchinson, MD<sup>\*</sup>

Daniel Mulrooney, MD, MS<sup>\*</sup>, Joseph Neglia, MD, MPH<sup>‡</sup>

Dennis Deapen, DrPH<sup>\*‡</sup>

Daniel C. Bowers, MD<sup>\*</sup>

Louise Strong, MD<sup>\*‡</sup>, Marilyn Stovall, MPH, PhD<sup>‡</sup>

---

\* Institutional Principal Investigator

# Project Principal Investigator (U24 CA55727)

‡ Member CCSS Steering Committee
